# Supplementary material for: Facile and scalable fabrication of flexible micro-supercapacitor with high volumetric performance based on ultrathin Co(OH)2 nanosheets
Source: Royal Society of Chemistry journal article supplement (doi:10.1039/d4ta02916j), 2024-01-01
Supplement: d4ta02916j1.pdf [file d4ta02916j1.pdf]

## Supplementary Information

# **Facile and Scalable Fabrication of Flexible Micro-supercapacitor with High Volumetric Performance Based on Ultrathin Co(OH)<sub>2</sub> Nanosheets**

*Pallavi Bhaktapralhad Jagdale,<sup>a</sup> Sayali Ashok Patil,<sup>a</sup> Mansi Pathak,<sup>a</sup> Prangya Bhol,<sup>a</sup> Amanda Sfeir,<sup>b</sup> Sébastien Royer,<sup>b</sup> Akshaya Kumar Samal,<sup>a</sup> Chandra sekhar Rout,<sup>a</sup> Manav Saxena<sup>a\*</sup>*

<sup>a</sup> Centre for Nano and Material Sciences, Jain (Deemed-to-be University), Jain Global Campus, Ramanagara, Bangalore 562112, India

<sup>b</sup> Université de Lille, CNRS, Centrale Lille, Université Artois, UMR 8181-UCCS-12 Unité de Catalyse et Chimie du Solide, Lille 59000, France

E-mail: s.manav@jainuniversity.ac.in, manavsaxena19@gmail.com

## Experimental section

### Preparation of PVA/KOH gel electrolyte:

2.5 g of polyvinyl alcohol (PVA) was first dissolved in 25 ml of distilled water under constant stirring at 60°C until a transparent and clear solution formed. Next, 2 M of KOH was added dropwise into the PVA polymer solution under continuous stirring. This solution was stirred at room temperature to get a homogeneous and viscous gel electrolyte.

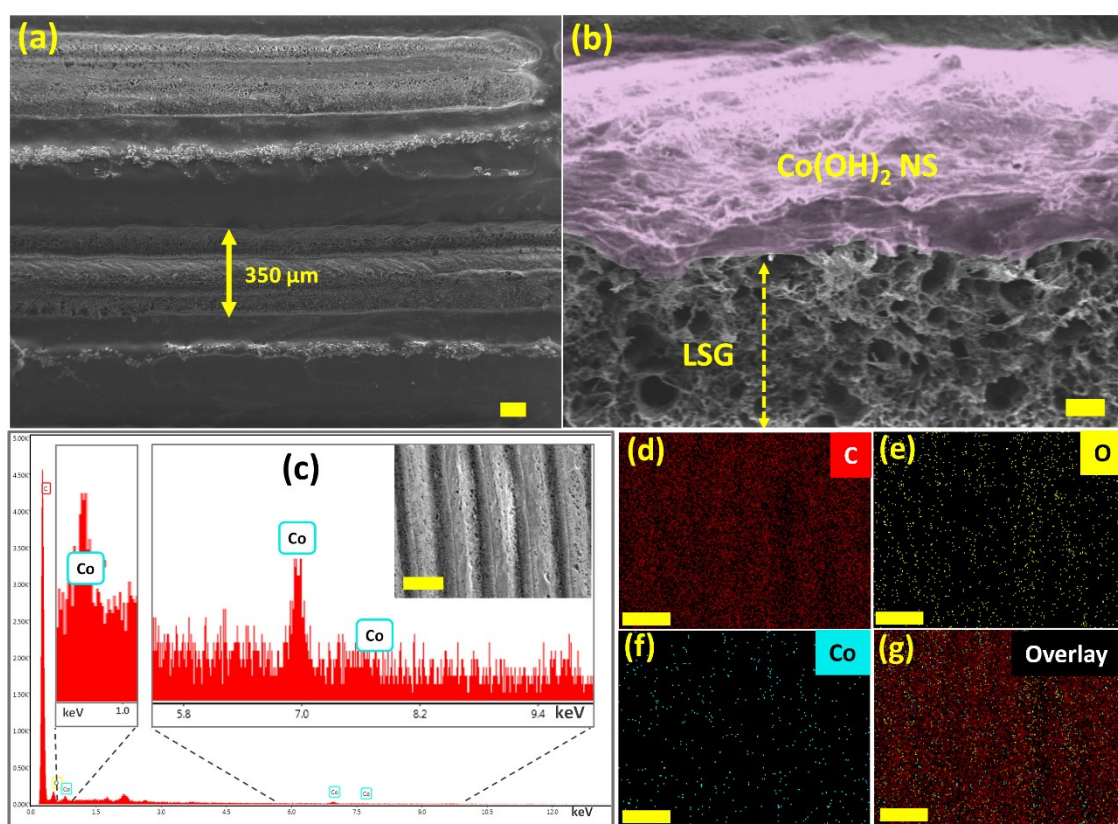

**Fig. S1.** FESEM images of CN-LSG MSC: (a) Low-magnification (b) Cross-sectional FESEM image showing uniform coverage of Co(OH)<sub>2</sub> NS on LSG (c) EDS spectrum, inset: EDS showing the presence of Co and FESEM image of Co(OH)<sub>2</sub> NS on LSG (d-g) elemental mapping showing uniform distribution of elements. Scale bar: (a) 100 μm, (b) 10 μm, (c-g) 200 μm.

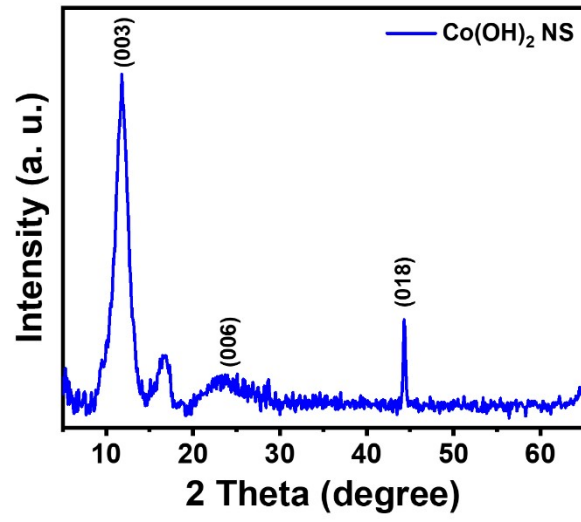

**Fig. S2.** XRD pattern of Co(OH)<sub>2</sub> nanosheet.

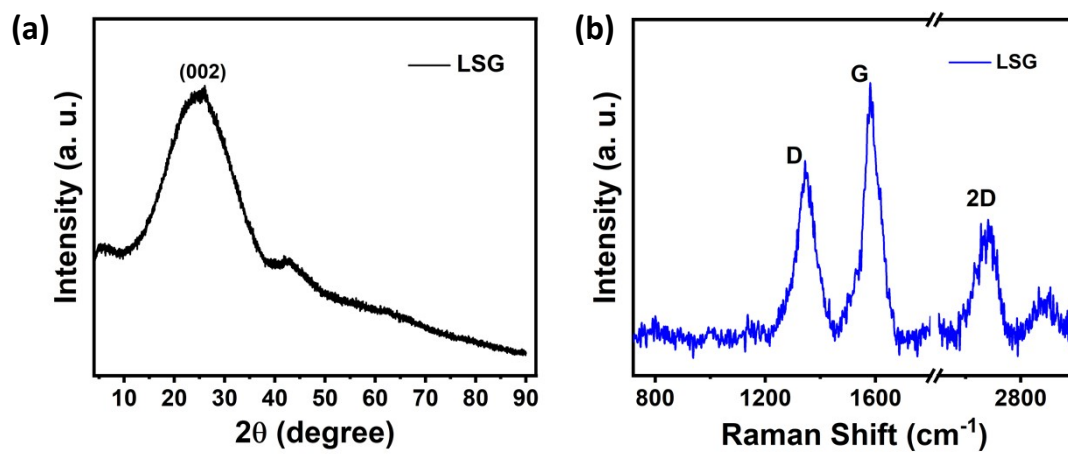

**Fig. S3.** (a) XRD and (b) Raman spectrum of laser-scribed graphene (LSG)

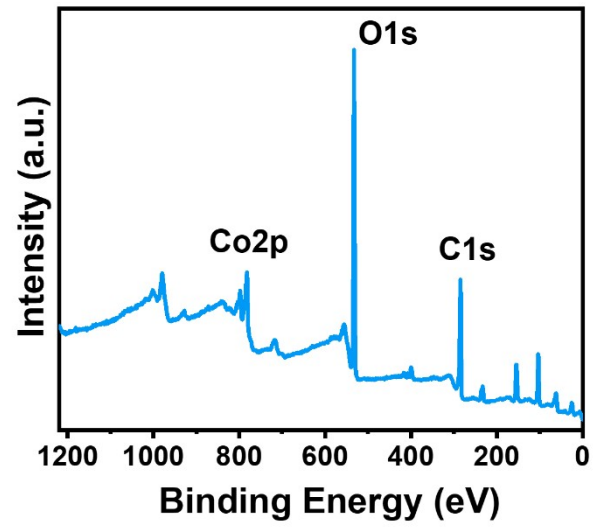

**Fig. S4.** XPS Survey spectrum of  $\text{Co(OH)}_2$  nanosheet.

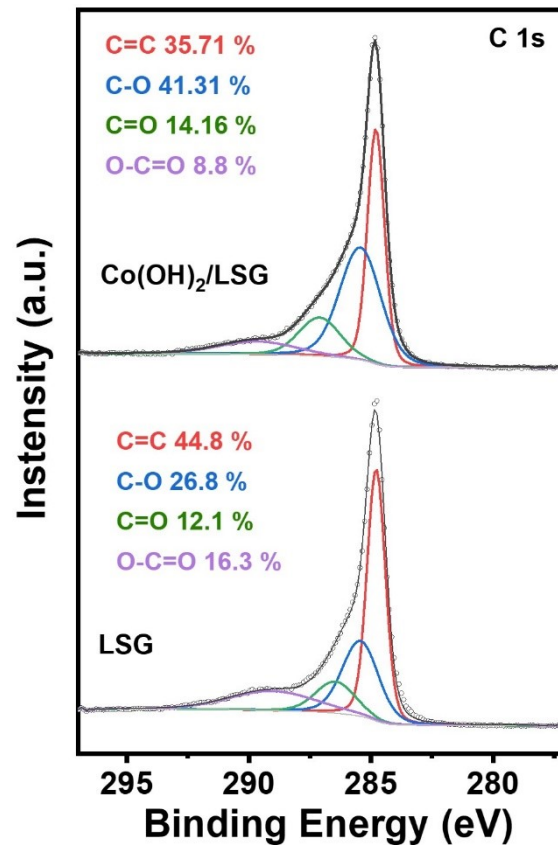

Fig. S5. (a) XPS spectrum of C1s of LSG

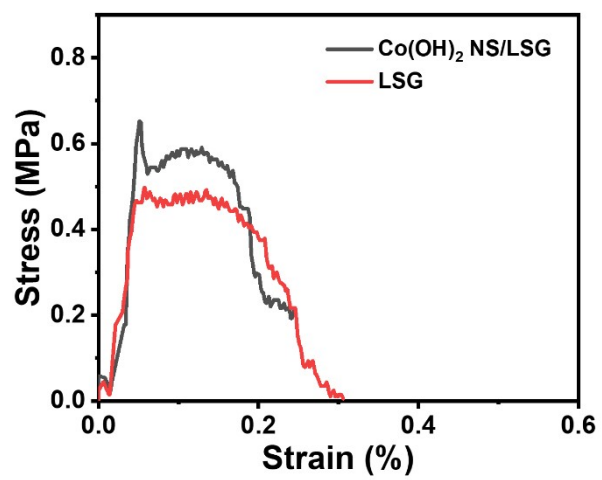

**Fig. S6.** Tensile stress-strain curve of LSG and Co(OH)<sub>2</sub>/LSG

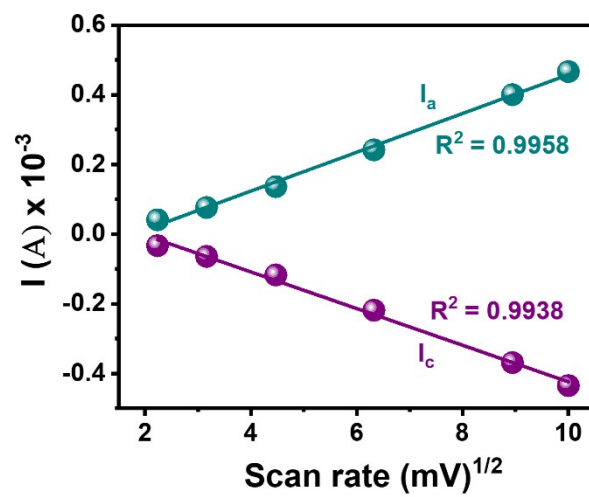

**Fig. S7.** Plot of the anodic ( $I_a$ ) and cathodic ( $I_c$ ) peak currents vs square root of scan rates.



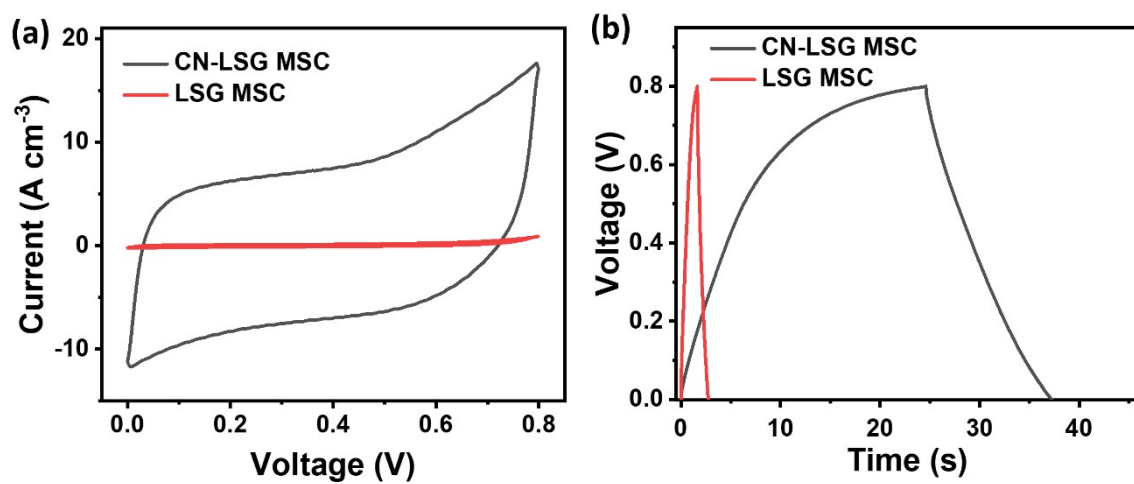

**Fig. S8.** Electrochemical performance of CN-LSG MSC and LSG MSC (a) CV at a scan rate of  $100 \text{ mV s}^{-1}$ , and (b) GCD at the current density of  $13 \text{ A cm}^{-3}$ .

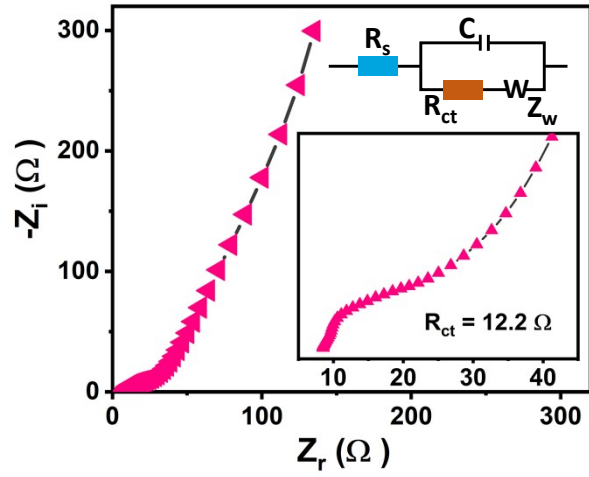

**Fig. S9.** Nyquist plot of CN-LSG MSC. Inset is a zoomed image showing an  $R_{ct}$  value of  $12.2 \Omega$ .

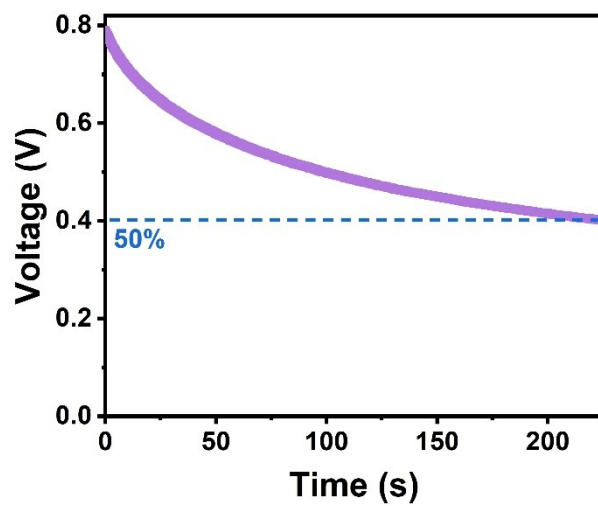

**Fig. S10.** Self-discharge characteristic of CN-LSG MSC: Voltage versus time after charging MSC at a constant current density of  $13 \text{ A cm}^{-3}$  up to a potential of 0.8 V.

**Table S1:** Mechanical properties of LSG and Co(OH)<sub>2</sub> NS /LSG electrodes.

| Electrode                   | Maximum Load (N) | Ultimate Stress (MPa-N/mm <sup>2</sup> ) | Displacement at Maximum Load (mm) | Tensile Strength (MPa) |
|-----------------------------|------------------|------------------------------------------|-----------------------------------|------------------------|
| Co(OH) <sub>2</sub> NS /LSG | 21.125           | 6.392                                    | 0.51                              | 6.401                  |
| LSG                         | 12.625           | 4.876                                    | 0.57                              | 4.874                  |

**Table S2:** Comparison of performance of CN-LSG MSC with recently reported MSCs.

| Material                         | C <sub>Vol</sub> (F cm <sup>-3</sup> ) | Energy density (mWh cm <sup>-3</sup> ) | Cyclic stability (%) / cycles | Reference        |
|----------------------------------|----------------------------------------|----------------------------------------|-------------------------------|------------------|
| PPY-hs@CoS                       | -                                      | 25.6                                   | 86/5,000                      | 1                |
| S-doped CoZnNi-OH/CuCoP/CW       | 290                                    | 9.73                                   | 93/5,000                      | 2                |
| Graphene/Co(OH) <sub>2</sub> /Ni | 21                                     | 18.6                                   | 94/10,000                     | 3                |
| Co-Ni/rGO                        | 3.85                                   | 0.63                                   | 90/3,000                      | 4                |
| αCo(OH) <sub>2</sub> /rGO        | 130                                    | 20                                     | 99/2000                       | 5                |
| Co(OH) <sub>2</sub>              | 39.7                                   | 12.4                                   | 84/10,000                     | 6                |
| Co(OH) <sub>2</sub> /rGO         | 54                                     | 6                                      | 77/5,000                      | 7                |
| CuO@CoFe LDH                     | -                                      | 1.85                                   | 99/2,000                      | 8                |
| CN-LSG                           | <b>258</b>                             | <b>22</b>                              | <b>96/20,000</b>              | <b>This work</b> |

## References

1. Y. Zhao, J. Zheng, J. Yang, W. Liu, F. Qiao, J. Lian, G. Li, T. Wang, J. Zhang and L. Wu, *Nano Research*, 2023, **16**, 555-563.
2. L. Naderi and S. Shahrokhian, *Chem. Eng. J.*, 2023, **476**, 146764.
3. Z. Zhang, Q. Xia, Y. Chen, X. Pan, E. Pameté, Y. Zhang, V. Presser, Q. Abbas and X. Chen, *Electrochim. Acta*, 2022, **433**, 141247.
4. J. Jung, J. R. Jeong, C. Dang Van, K. Kang and M. H. Lee, *ACS Appl. Electronic Mater.*, 2022, **4**, 4840-4848.
5. Y. Rong, Y. Chen, J. Zheng, Y. Zhao and Q. Li, *J. Colloid Interface Sci.*, 2021, **598**, 1-13.
6. S. Wang, Z.-S. Wu, F. Zhou, X. Shi, S. Zheng, J. Qin, H. Xiao, C. Sun and X. Bao, *npj 2D Mater. Appl.*, 2018, **2**, 7.
7. N. Kurra, Q. Jiang and H. N. Alshareef, *Nano Energy*, 2015, **16**, 1-9.
8. Z. Li, M. Shao, L. Zhou, R. Zhang, C. Zhang, J. Han, M. Wei, D. G. Evans and X. Duan, *Nano Energy*, 2016, **20**, 294-304.
